# Supplementary material for: Clinicopathological Features and Prognosis of Primary GISTs with Tumor Rupture in the Real World
Source: PubMed Central journal article supplement (PMC5976711; doi:10.1245/s10434-018-6505-7), 2018-05-11

Supplement Table 1. The results of the questionnaire for primary surgeon of each participant hospitals

| <b>Conditions</b>                                                                         | <b>Yes</b> | <b>No</b> | <b>Yes/No</b> | <b>Pre or Intra<sup>#</sup></b> |
|-------------------------------------------------------------------------------------------|------------|-----------|---------------|---------------------------------|
| Tumor fracture with blood-tinged ascites at laparotomy                                    | 25         | 0         | 0             | Pre                             |
| Intestinal perforation on tumor with blood-tinged ascites at laparotomy                   | 23         | 2         | 0             | Pre                             |
| Microscopically direct tumor invasion into adjacent resected organs                       | 10         | 15        | 0             | Pre                             |
| Intraluminal tumor perforation                                                            | 3          | 22        | 0             | Pre                             |
| Piecemeal resection during operation                                                      | 25         | 0         | 0             | Intra                           |
| Iatrogenic fracture of tumors                                                             | 25         | 0         | 0             | Intra                           |
| Macroscopic injuries to the pseudocapsule exposing tumor cells into the peritoneal cavity | 20         | 4         | 1             | Intra                           |
| Minor or microscopic injuries to pseudocapsule without exposure of tumor cells            | 3          | 22        | 0             | Intra                           |
| Open biopsy                                                                               | 21         | 4         | 0             | Intra                           |
| Core needle biopsy without complications                                                  | 7          | 18        | 0             | Pre                             |
| Fine needle biopsy without complications                                                  | 1          | 24        | 0             | Pre                             |

The questionnaire was sent to the 33 hospitals and institutions, and the answers were received from 25 primary investigators in each hospital and institution. (Valid Response Rate : 76%)

In the questionnaire, it was asked for investigators whether each listed item may be considered as tumor rupture. Yes: investigators consider that it is rupture; No: investigators do not consider; Yes/No: depending on circumstances and they had no clear answer.

# indicates classification of preoperative or intraoperative rupture in the study; Pre: preoperative rupture, Intra: intraoperative rupture

Supplement Table 2. Comparison of between the two tumor rupture types (study cohort)

|                          |             | Preoperative<br>(N=12) | Intraoperative<br>(N=9) | P value |
|--------------------------|-------------|------------------------|-------------------------|---------|
| Primary Location         | Gastric     | 9 (75%)                | 4 (44%)                 | 0.1536  |
|                          | Non-gastric | 3 (25%)                | 5 (56%)                 |         |
| Median tumor size (cm)   |             | 7.5 (2.6-30.0)         | 10.6 (4.0-30.0)         | 0.7872  |
| Symptoms                 | No          | 0 (0%)                 | 1 (11%)                 | 0.2367  |
|                          | Yes         | 12 (100%)              | 8 (89%)                 |         |
| Median Mitosis (/50 HPF) |             | 2.5 (0.0-250)          | 16.6 (1.0-75.0)         | 0.2898  |
| Recurrence               | No          | 4 (33%)                | 1 (11%)                 | 0.2367  |
|                          | Yes         | 8 (67%)                | 8 (89%)                 |         |
| Survival                 | Alive       | 10 (83%)               | 6 (67%)                 | 0.3749  |
|                          | Dead        | 2 (17%)                | 3 (33%)                 |         |

Supplement Table 3. Backgrounds of GIST patients with and without tumor rupture (Validation cohort)

|                                                     |                             | Non-ruptured<br>(N=167) | Ruptured<br>(N=5)       | P value |
|-----------------------------------------------------|-----------------------------|-------------------------|-------------------------|---------|
| Age (years)                                         |                             | 62 (33-89)              | 75 (17-81)              | <0.0001 |
| Gender                                              | Male                        | 99 (59%)                | 1 (20%)                 | 0.1624  |
|                                                     | Female                      | 68 (41%)                | 4 (80%)                 |         |
| Primary Location <sup>#</sup>                       | Gastric                     | 116 (69%)               | 3 (60%)                 | 0.6442  |
|                                                     | Non-gastric                 | 51 (31%)                | 2 (40%)                 |         |
| Association of cancer                               | No                          | 130 (78%)               | 5 (100%)                | 0.5861  |
|                                                     | Yes                         | 37 (22%)                | 0 (0%)                  |         |
|                                                     | Unavailable                 | 0 (0%)                  | 0 (0%)                  |         |
| Median tumor size (cm)                              |                             | 5.0 (1.1-25.0)          | 5.0 (3.3-19.0)          | 0.4027  |
| Neoadjuvant <sup>#</sup>                            | No                          | 152 (91%)               | 5 (100%)                | 1.0000  |
|                                                     | Yes                         | 15 (9%)                 | 0 (0%)                  |         |
|                                                     | Unavailable                 | 0 (0%)                  | 0 (0%)                  |         |
| Adjuvant therapy <sup>#</sup>                       | No                          | 138 (83%)               | 4 (80%)                 | 1.0000  |
|                                                     | Yes                         | 29 (17%)                | 1 (20%)                 |         |
|                                                     | Unavailable                 | 0 (0%)                  | 0 (0%)                  |         |
| Surgery                                             | Open                        | 112 (67%)               | 4 (80%)                 | 0.0336  |
|                                                     | Laparoscopic                | 51 (31%)                | 0 (0%)                  |         |
|                                                     | Local                       | 4 (2%)                  | 1 (20%)                 |         |
| R                                                   | R0                          | 161 (96%)               | 1 (20%)                 | <0.0001 |
|                                                     | R1                          | 6 (4%)                  | 4 (80%)                 |         |
| Median mitosis (/50 HPF)                            |                             | 5 (0-250)               | 7 (4-50)                | 0.6353  |
| Cell type                                           | Spindle                     | 79 (47%)                | 4 (80%)                 | 0.7991  |
|                                                     | Epithelioid                 | 2 (1%)                  | 0 (0%)                  |         |
|                                                     | Mixed                       | 7 (4%)                  | 0 (0%)                  |         |
|                                                     | Unavailable                 | 79 (47%)                | 1 (20%)                 |         |
| Median RFS                                          | (95% CI; years)             | 8.4 (7.4-9.3)           | 3.2 (0.7-5.8)           | 0.0392  |
| Estimated median 5-year RFS (median+SE)             |                             | 73.7% <sub>+3.9%</sub>  | 26.7% <sub>+22.6%</sub> |         |
| Recurrence                                          | No                          | 122 (73%)               | 2 (40%)                 | 0.1333  |
|                                                     | Yes                         | 45 (27%)                | 3 (60%)                 |         |
| Recurrence sites <sup>#</sup>                       | Liver                       | 26 (58%)                | 2 (66%)                 | 0.0392  |
|                                                     | Lung                        | 1 (2%)                  | 2 (66%)                 |         |
|                                                     | Local                       | 5 (11%)                 | 1 (33%)                 |         |
|                                                     | Peritoneum                  | 15 (33%)                | 1 (33%)                 |         |
|                                                     | Others                      | 4 (9%)                  | 0 (0%)                  |         |
|                                                     | Unavailable                 | 1 (2%)                  | 0 (0%)                  |         |
| Estimated 5-year median OS (median+SE) <sup>§</sup> |                             | 91.9% <sub>+2.4%</sub>  | 100%                    |         |
| Survival                                            | Alive                       | 146 (87%)               | 5 (100%)                | 1.0000  |
|                                                     | Dead                        | 21 (13%)                | 0 (0%)                  |         |
|                                                     | Death due to GIST           | 17 (81%)                | 0 (0%)                  |         |
|                                                     | Death due to other diseases | 4 (19%)                 | 0 (0%)                  |         |

#: duplicated number

\$. Median OS could not be calculated.

Supplement Table 4. Multivariate analysis for RFS and OS (Validation cohort and integrated analysis)

Recurrence-free Survival

| Independent Prognostic Factors | HR (95%CI)            | P value |
|--------------------------------|-----------------------|---------|
| Size (cm)                      | 1.013 (1.006 - 1.020) | 0.0001  |
| Mitotic Count (/50HPF)         | 1.020 (1.012 - 1.027) | <0.0001 |
| Rupture (Ref: non-rupture)     | 12.08 (2.957 – 49.32) | 0.0015  |

Other factors included in the analysis using a forward stepwise Cox proportional hazards model are age (P=0.318), gender (P=0.299), tumor location (P=0.469), neoadjuvant therapy (P=0.813), adjuvant therapy (P=0.0879; HR=0.409), and R (completeness of surgery) (P=0.293).

Overall Survival

| Independent Prognostic Factors | HR (95%CI)            | P value |
|--------------------------------|-----------------------|---------|
| Gender (Ref: female)           | 7.258 (1.222 – 43.10) | 0.02919 |
| Mitotic Count (/50HPF)         | 1.013 (1.003 - 1.024) | 0.01330 |
| Size (cm)                      | 1.014 (1.002 – 1.025) | 0.01999 |

Other factors included in the analysis using a forward stepwise Cox proportional hazards model are age (P=0.779), rupture (P=0.591), tumor location (P=0.717), neoadjuvant therapy (P=0.529), adjuvant therapy (P=0.3523) and R (completeness of surgery) (P=0.368).

The results of integrated analysis of the two data sets.

Recurrence-free Survival

| Independent Prognostic Factors | HR    | 95%CI |       | P value |
|--------------------------------|-------|-------|-------|---------|
| Gender                         | 1.393 | 1.178 | 1.645 | 0.047   |
| Rupture                        | 6.539 | 4.998 | 8.525 | <0.001  |
| Tumor Size                     | 1.006 | 1.004 | 1.008 | 0.003   |
| Mitotic Count                  | 1.013 | 1.011 | 1.015 | <0.001  |
| Location                       | 1.495 | 1.254 | 1.782 | 0.022   |

Other factors included in the analysis using a forward stepwise Cox proportional hazards model are age (P=0.498), R (P=0.851), neoadjuvant therapy (P=0.943), and adjuvant therapy (P=0.126).

Overall Survival

| Independent Prognostic Factors | HR    | 95%CI |       | P value |
|--------------------------------|-------|-------|-------|---------|
| Age                            | 1.025 | 1.013 | 1.038 | 0.031   |
| Gender                         | 2.445 | 1.859 | 3.216 | 0.001   |
| Mitotic Count                  | 1.012 | 1.001 | 1.015 | <0.001  |

Other factors included in the analysis using a forward stepwise Cox proportional hazards model are

rupture (P=0.402), tumor size (P=0.206), R (P=0.245), tumor location (P=0.592), neoadjuvant therapy (P=0.646), and adjuvant therapy (P=0.4406).

## Supplement Figure 1. Patient selection (Study cohort)

### Study cohort

743 patients with locally diagnosed GISTs who underwent surgery in institutes and hospitals (2003-2007)

excluded

- Non-GISTs by immunohistochemistry (n=7)
- Pathologically not confirmed tumors (n=13)

723 patients with GIST

excluded

- Metastatic disease (n=43)
- No surgery for primary disease (n=11)
- R2 surgery (n=4)

665 patients included in this study

### Validation cohort

182 patients with locally diagnosed GISTs who underwent surgery in institutes and hospitals (2000-2014)

excluded

- Non-GISTs by immunohistochemistry (n=0)
- Pathologically not confirmed tumors (n=0)

182 patients with GIST

excluded

- Metastatic disease (n=8)
- No surgery for primary disease (n=0)
- R2 surgery (n=2)

172 patients included in this study

Supplement Figure 2. Cumulative Incidence of Recurrence (Study Cohort)

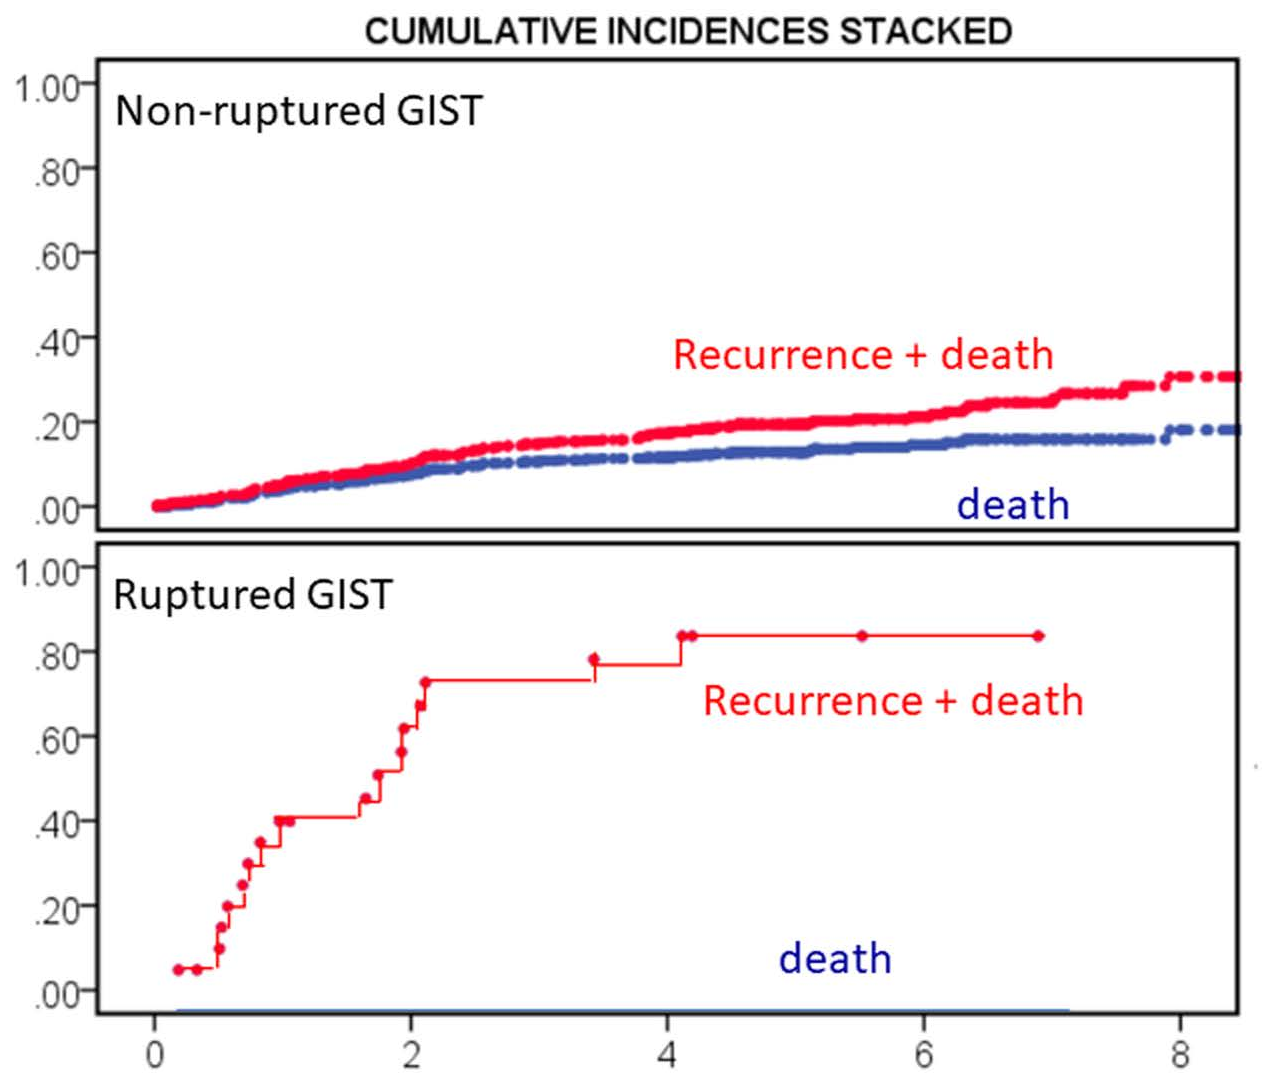

Supplement: 10434_2018_6505_MOESM1_ESM.pdf [file 10434_2018_6505_MOESM1_ESM.pdf]
